# Supplementary material
Source: MDPI journal article supplement (https://www.mdpi.com/2073-4441/13/16/2195)
Supplement: s1 [file s1]

**Supplementary Table S1:** Zooplankton density (org. m<sup>-3</sup>) in the post- and pre-flood periods at sites 1-15.

| SAMPLING SITES                  |       |       |       |      |      |       |       |       |      |      |      |      |      |      |      |
|---------------------------------|-------|-------|-------|------|------|-------|-------|-------|------|------|------|------|------|------|------|
|                                 | 1     | 2     | 3     | 4    | 5    | 6     | 7     | 8     | 9    | 10   | 11   | 12   | 13   | 14   | 15   |
| POST-FLOOD PERIOD               |       |       |       |      |      |       |       |       |      |      |      |      |      |      |      |
| Rotifera                        |       |       |       |      |      |       |       |       |      |      |      |      |      |      |      |
| <i>Keratella cochlearis</i>     | 0     | 0     | 0     | 0    | 0    | 0     | 76    | 153   | 0    | 611  | 306  | 688  | 764  | 204  | 841  |
| <i>Keratella quadrata</i>       | 0     | 76    | 76    | 76   | 0    | 229   | 229   | 0     | 0    | 0    | 0    | 0    | 0    | 0    | 0    |
| <i>Keratella tropica</i>        | 61    | 0     | 76    | 382  | 76   | 382   | 153   | 0     | 102  | 229  | 0    | 459  | 382  | 102  | 611  |
| <i>Brachionus calyciflorus</i>  | 0     | 0     | 0     | 0    | 0    | 0     | 382   | 2599  | 41   | 153  | 76   | 459  | 0    | 51   | 76   |
| <i>Brachionus falcatus</i>      | 0     | 0     | 0     | 0    | 0    | 0     | 0     | 0     | 0    | 0    | 0    | 0    | 76   | 51   | 306  |
| <i>Asplanchna</i> sp.           | 489   | 153   | 611   | 76   | 0    | 153   | 306   | 382   | 0    | 76   | 0    | 0    | 0    | 0    | 0    |
| <i>Trichocerca cylindrica</i>   | 0     | 0     | 0     | 0    | 0    | 0     | 76    | 0     | 0    | 153  | 76   | 306  | 153  | 0    | 153  |
| Cladocera                       |       |       |       |      |      |       |       |       |      |      |      |      |      |      |      |
| <i>Alona intermedia</i>         | 795   | 306   | 299   | 382  | 0    | 459   | 229   | 0     | 0    | 0    | 0    | 0    | 0    | 0    | 0    |
| <i>Bosmina longirostris</i>     | 367   | 229   | 306   | 306  | 0    | 0     | 153   | 0     | 61   | 306  | 76   | 841  | 76   | 306  | 459  |
| <i>Chydorus sphaericus</i>      | 0     | 0     | 0     | 0    | 0    | 0     | 0     | 0     | 41   | 0    | 0    | 0    | 0    | 0    | 0    |
| <i>Ceriodaphnia reticulata</i>  | 1162  | 611   | 1223  | 611  | 229  | 2140  | 611   | 0     | 652  | 76   | 0    | 153  | 76   | 0    | 1376 |
| <i>Daphnia longispina</i>       | 489   | 229   | 688   | 76   | 0    | 1987  | 382   | 0     | 143  | 0    | 0    | 76   | 76   | 51   | 535  |
| <i>Diaphanosoma mongolianum</i> | 1223  | 994   | 1376  | 1605 | 76   | 1070  | 1070  | 229   | 774  | 0    | 153  | 1070 | 229  | 204  | 2751 |
| <i>Moina micrura</i>            | 183   | 153   | 764   | 76   | 0    | 76    | 76    | 0     | 0    | 0    | 0    | 0    | 76   | 102  | 0    |
| Copepoda                        |       |       |       |      |      |       |       |       |      |      |      |      |      |      |      |
| <i>Thermodiaptomus galebi</i>   | 13147 | 10777 | 15745 | 1146 | 229  | 12458 | 4662  | 153   | 2629 | 229  | 0    | 1681 | 535  | 612  | 2904 |
| <i>Mesocyclops ogunnus</i>      | 8439  | 7719  | 5503  | 6344 | 1605 | 4127  | 2599  | 764   | 1080 | 229  | 229  | 1529 | 1223 | 612  | 4586 |
| <i>Thermocyclops neglectus</i>  | 0     | 0     | 0     | 1146 | 0    | 4127  | 0     | 0     | 1019 | 0    | 0    | 917  | 0    | 0    | 2446 |
| <i>Harpacticoida</i> sp.        | 0     | 0     | 0     | 0    | 0    | 0     | 841   | 229   | 163  | 0    | 0    | 0    | 0    | 0    | 0    |
| Nauplius larvae                 | 15471 | 9936  | 13757 | 8560 | 4815 | 12229 | 12764 | 12764 | 7296 | 7414 | 1529 | 7949 | 4586 | 3774 | 9324 |
| PRE-FLOOD PERIOD                |       |       |       |      |      |       |       |       |      |      |      |      |      |      |      |

|                                 |     |      |      |      |      |      |      |      |      |       |      |      |      |      |      |
|---------------------------------|-----|------|------|------|------|------|------|------|------|-------|------|------|------|------|------|
| <b>Rotifera</b>                 |     |      |      |      |      |      |      |      |      |       |      |      |      |      |      |
| <i>Keratella cochlearis</i>     | 245 | 1628 | 2488 | 75   | 0    | 370  | 153  | 0    | 148  | 2659  | 458  | 276  | 76   | 611  | 306  |
| <i>Keratella quadrata</i>       | 0   | 0    | 0    | 0    | 0    | 0    | 0    | 0    | 74   | 183   | 0    | 0    | 0    | 0    | 0    |
| <i>Keratella tropica</i>        | 0   | 0    | 0    | 75   | 0    | 0    | 0    | 0    | 0    | 0     | 0    | 0    | 0    | 76   | 0    |
| <i>Brachionus calyciflorus</i>  | 0   | 0    | 0    | 0    | 0    | 0    | 0    | 0    | 0    | 0     | 0    | 0    | 306  | 458  | 840  |
| <i>Brachionus falcatus</i>      | 0   | 0    | 0    | 0    | 74   | 0    | 0    | 0    | 0    | 0     | 76   | 92   | 0    | 0    | 0    |
| <i>Asplanchna</i> sp.           | 0   | 0    | 75   | 0    | 0    | 0    | 0    | 0    | 0    | 183   | 0    | 0    | 0    | 0    | 0    |
| <i>Lecane luna</i>              | 0   | 0    | 226  | 75   | 0    | 0    | 0    | 0    | 0    | 0     | 0    | 0    | 0    | 0    | 0    |
| <i>Polyarthra vulgaris</i>      | 0   | 1184 | 3318 | 377  | 0    | 518  | 0    | 0    | 0    | 0     | 0    | 0    | 0    | 0    | 0    |
| <i>Synchaeta</i> SP.            | 0   | 148  | 0    | 0    | 0    | 0    | 0    | 0    | 0    | 0     | 0    | 0    | 0    | 76   | 0    |
| <i>Trichocerca cylindrica</i>   | 61  | 0    | 0    | 0    | 0    | 0    | 0    | 0    | 0    | 0     | 0    | 0    | 153  | 0    | 0    |
| <b>Cladocera</b>                |     |      |      |      |      |      |      |      |      |       |      |      |      |      |      |
| <i>Bosmina longirostris</i>     | 183 | 74   | 452  | 0    | 222  | 444  | 0    | 0    | 296  | 734   | 306  | 322  | 458  | 153  | 840  |
| <i>Ceriodaphnia reticulata</i>  | 122 | 370  | 3091 | 679  | 4292 | 4218 | 459  | 1258 | 1110 | 1559  | 764  | 414  | 76   | 229  | 306  |
| <i>Daphnia longispina</i>       | 61  | 74   | 151  | 0    | 0    | 0    | 102  | 0    | 0    | 92    | 153  | 276  | 153  | 76   | 76   |
| <i>Diaphanosoma mongolianum</i> | 61  | 0    | 75   | 75   | 370  | 148  | 408  | 370  | 1036 | 1742  | 2598 | 4002 | 382  | 229  | 2598 |
| <i>Moina micrura</i>            | 0   | 0    | 0    | 0    | 0    | 0    | 153  | 888  | 592  | 0     | 0    | 414  | 0    | 0    | 0    |
| <b>Copepoda</b>                 |     |      |      |      |      |      |      |      |      |       |      |      |      |      |      |
| <i>Thermodiaptomus galebi</i>   | 61  | 74   | 980  | 0    | 1184 | 1480 | 306  | 296  | 592  | 367   | 382  | 644  | 153  | 382  | 0    |
| <i>Mesocyclops ogunnus</i>      | 0   | 518  | 2413 | 490  | 518  | 1110 | 204  | 1221 | 370  | 459   | 130  | 1702 | 306  | 611  | 1834 |
| Harpacticoida                   | 0   | 0    | 226  | 0    | 1332 | 592  | 51   | 222  | 148  | 642   | 153  | 230  | 76   | 0    | 535  |
| Nauplius larvae                 | 238 | 3996 | 8671 | 1810 | 2072 | 3626 | 1377 | 1406 | 2664 | 15772 | 4584 | 3312 | 2216 | 2980 | 1222 |
| Copepodite stage                | 428 | 518  | 2413 | 490  | 4884 | 2664 | 867  | 1221 | 1332 | 3026  | 1299 | 2668 | 458  | 306  | 1757 |
